# Supplementary material
Source: ML conference proceedings conference paper supplement (https://openaccess.thecvf.com/content/CVPR2024/html/Golatkar_CPR_Retrieval_Augmented_CVPR_2024_paper.html)
Supplement: Supplementary file 1 [file Golatkar_CPR_Retrieval_Augmented_CVPR_2024_supplemental.pdf]

# CPR: Retrieval Augmented Generation for Copyright Protection

## Supplementary Material

### A. Proofs of the Propositions and Lemmas

#### A.1. Proposition 1

*Proof.* of Proposition 1.

$$\begin{aligned}
 \nabla_{x_t} \log p_t(x_t|c) &= \nabla_{x_t} \log \int p_t(x_t|x_0) [w_0 p_D(x_0|c) + w_1 p_{D_{\text{retr}}}(x_0|c)] dx_0 \\
 &= \frac{1}{\int p_t(x_t|x_0) [w_0 p_D(x_0|c) + w_1 p_{D_{\text{retr}}}(x_0|c)] dx_0} \left[ \nabla_{x_t} \int p_t(x_t|x_0) w_0 p_D(x_0|c) dx_0 \right. \\
 &\quad \left. + \nabla_{x_t} \int p_t(x_t|x_0) w_1 p_{D_{\text{retr}}}(x_0|c) dx_0 \right] \\
 &= \frac{1}{p_t(x_t|c)} \left[ \nabla_{x_t} \int p_t(x_t|x_0) w_0 p_D(x_0|c) dx_0 + \nabla_{x_t} \int p_t(x_t|x_0) w_1 p_{D_{\text{retr}}}(x_0|c) dx_0 \right] \\
 &= \frac{1}{p_t(x_t|c)} \left[ w_0 \int p_t(x_t|x_0) p_D(x_0|c) dx_0 \nabla_{x_t} \log \int p_t(x_t|x_0) p_D(x_0|c) dx_0 \right. \\
 &\quad \left. + w_1 \int p_t(x_t|x_0) p_{D_{\text{retr}}}(x_0|c) dx_0 \nabla_{x_t} \log \int p_t(x_t|x_0) p_{D_{\text{retr}}}(x_0|c) dx_0 \right] \\
 &= \frac{w_0 \int p_t(x_t|x_0) p_D(x_0|c) dx_0}{p_t(x_t|c)} \nabla_{x_t} \log \int p_t(x_t|x_0) p_D(x_0|c) dx_0 \\
 &\quad + \frac{w_1 \int p_t(x_t|x_0) p_{D_{\text{retr}}}(x_0|c) dx_0}{p_t(x_t|c)} \nabla_{x_t} \log \int p_t(x_t|x_0) p_{D_{\text{retr}}}(x_0|c) dx_0
 \end{aligned}$$

□

#### A.2. Proposition 2

*Proof.* of Proposition 2. Let  $s_{\theta_1}(x_t, t, c) \triangleq s_{\theta_0 + \Delta\theta_1}(x_t, t, c)$  be the optimal solution to the retrieval optimization problem. We use CLIP embeddings of the retrieved images for generation, and bound its difference from the optimal.

$$\begin{aligned}
 \|s_{\theta_1}(x_t, t, c) - \hat{s}_{\theta_0}(x_t, t, c_{\text{test}})\| &= \|s_{\theta_1}(x_t, t, c) - s_{\theta_0}\left(x_t, t, \frac{1}{m} \sum_{x_i \in D_{\text{retr}}} \text{CLIP}(x_i)\right)\| \\
 &= \|s_{\theta_1}(x_t, t, c) - s_{\theta_0}(x_t, t, c) + s_{\theta_0}(x_t, t, c) - s_{\theta_0}\left(x_t, t, \frac{1}{m} \sum_{x_i \in D_{\text{retr}}} \text{CLIP}(x_i)\right)\| \\
 &\leq \|s_{\theta_1}(x_t, t, c) - s_{\theta_0}(x_t, t, c)\| + \|s_{\theta_0}(x_t, t, c) - s_{\theta_0}\left(x_t, t, \frac{1}{m} \sum_{x_i \in D_{\text{retr}}} \text{CLIP}(x_i)\right)\| \\
 &\leq \|s_{\theta_0 + \Delta\theta_1}(x_t, t, c) - s_{\theta_0}(x_t, t, c)\| + \|s_{\theta_0}(x_t, t, c) - s_{\theta_0}\left(x_t, t, \frac{1}{m} \sum_{x_i \in D_{\text{retr}}} \text{CLIP}(x_i)\right)\| \\
 &\leq l_\theta \|\Delta\theta_1\| + l_c \left\| \frac{1}{m} \sum_{x_i \in D_{\text{retr}}} \text{CLIP}(x_i) \right\|
 \end{aligned} \tag{13}$$

□

#### A.3. Lemma 1

*Proof.* of Lemma 1. [62] proved in Theorem 3.1, that sampling from Eq. (9) produces samples which are copy-protected. In Algorithm 1, we sample using the score function:  $0.5(\nabla_{x_t} \log \int q_t(x_t|x_0) q^{(1)}(x|c) dx_0 + \nabla_{x_t} \log \int q_t(x_t|x_0) q^{(2)}(x|c) dx_0)$ , which smoothly interpolates between  $\mathcal{N}(0, I)$  at  $t = T$ , and Eq. (9) at  $t = 0$ . We need to show that using Langevin based backward diffusion in Algorithm 1 indeed generates samples from the desired distribution. The convergence results

for Langevin dynamics have been well studied in practice [10, 16, 44, 61], [48] has shown that Langevin dynamics converge exponentially fast to the distribution estimated by the gradients. Theorem 2.1 from [48] provides the result on the convergence of Langevin dynamics in continuous time. For the sake of completeness we will extend the results from [66] to show that Algorithm 1 generates samples from Eq. (9).

We will re-state the assumptions from [66], for a distribution  $\nu_t(x_t)$ , and score estimator  $s_t(x_t)$ . In our case  $\nu_t(x_t) = 0.5(\nabla_{x_t} \log \int q_t(x_t|x_0)q^{(1)}(x|c)dx_0 + \nabla_{x_t} \log \int q_t(x_t|x_0)q^{(2)}(x|c)dx_0)$ , and  $s_t(x_t)$  is the average of the safe diffusion flow and retrieval mixture score.

1. LSI: For any probability distribution  $\rho$ ,  $C_0 > 0$ ,  $\int \rho_t \log \frac{\rho_t}{\nu_t} dx \leq \frac{1}{2C_0} \int \rho_t \left\| \nabla \log \frac{\rho_t}{\nu_t} \right\|^2 dx$
2. L-Smoothness:  $-\log \nu_t$  is L-smooth
3. Lipschitz score estimator:  $s_t(x_t)$  is  $L_s$ -lipschitz
4. MGF error assumption:  $M_t = \sqrt{\mathbb{E}_{\nu_t}[\exp r \|\nabla \log \nu_t(x_t) - s_t(x_t)\|^2]} \leq \infty$

Then from Theorem 1 in [66] we know that

$$\text{KL}(\rho_t(x_t)||\nu_t(x_t)) \leq \exp\left(-\frac{1}{4}C_0hN\right) \text{KL}(\rho_{t+1}(x_{t+1})||\nu_{t+1}(x_{t+1})) + C_1\epsilon_t + C_2M_t \quad (14)$$

where  $N$  is from the Algorithm 1,  $C_1 = O\left(\frac{dLL_s^2}{C_0}\right)$ ,  $C_2 = \frac{16}{3}$ . Eq. (14) result is the obtain by running the inner loop in Algorithm 1. Using the previous equation recursively for Algorithm 1, we obtain that,

$$\begin{aligned} \text{KL}(\rho_0(x_0)||\nu_0(x_0)) &\leq \exp\left(-\frac{1}{4}C_0hNT\right) \text{KL}(\rho_T(x_T)||\nu_T(x_T)) \\ &\quad + \sum_{t=1}^T \exp\left(-\frac{1}{4}C_0hN(T-t)\right)\epsilon_t C_1 + \sum_{t=1}^T \exp\left(-\frac{1}{4}C_0hN(T-t)\right)M_t C_1 \end{aligned} \quad (15)$$

where  $\nu_0(x_0)$  is the distribution in Eq. (9). Since we use DNNs with sufficient capacity, we can assume that  $M_t \rightarrow 0$ , then as  $\epsilon_t \rightarrow 0$ , and  $T \rightarrow \infty$ , we have that  $\text{KL}(\rho_0(x_0)||\nu_0(x_0)) \rightarrow 0$ , which implies that Algorithm 1 generates samples from Eq. (9).  $\square$

#### A.4. Proposition 3

*Proof.* of Proposition 3 Let  $\tilde{s}(x_t, t, c; \tilde{q}) = \mathbb{E}_{\tilde{q}(x_0|x_t, c)}\left[\frac{x_t - \gamma_t x_0}{\sigma_t}\right]$ , where  $\tilde{q}(x_0|c, t) = q^{(1)}(x_0|c)\mathbb{1}_{t \notin J} + q^{(2)}(x_0|c)\mathbb{1}_{t \in J}$ .

$$\begin{aligned} \tilde{s}(x_t, t, c; \tilde{q}) &= \mathbb{E}_{\tilde{q}(x_0|x_t, c)}\left[\frac{x_t - \gamma_t x_0}{\sigma_t}\right] \\ &= \int \tilde{q}(x_0|x_t, c)\left[\frac{x_t - \gamma_t x_0}{\sigma_t}\right] dx_0 \\ &= \int \left(q^{(1)}(x_0|c)\mathbb{1}_{t \notin J} + q^{(2)}(x_0|c)\mathbb{1}_{t \in J}\right)\left[\frac{x_t - \gamma_t x_0}{\sigma_t}\right] dx_0 \\ &= \int q^{(1)}(x_0|c)\mathbb{1}_{t \notin J}\left[\frac{x_t - \gamma_t x_0}{\sigma_t}\right] dx_0 + \int q^{(2)}(x_0|c)\mathbb{1}_{t \in J}\left[\frac{x_t - \gamma_t x_0}{\sigma_t}\right] dx_0 \\ &= \tilde{s}(x_t, t, c; q^{(1)})\mathbb{1}_{t \notin J} + \tilde{s}(x_t, t, c; q^{(2)})\mathbb{1}_{t \in J} \end{aligned}$$

$\square$

#### A.5. Lemma 2

*Proof.* of Lemma 2 We use Proposition 3 in Algorithm 2 for CPR-generation. Let  $q^{(1)}$  be the safe model in accordance with the assumptions in Sec. 5. To show that Algorithm 2 is NAF, we need to bound  $\Delta_{\max}$ . To show that  $\tilde{q}(x_0|c, t)$  satisfies NAF

we need to bound:

$$\begin{aligned}
\log \frac{\tilde{q}(x_0|c)}{q^{(1)}(x_0|c)} &= \int \mathbb{E}_\epsilon \|\epsilon - \tilde{s}(x_t, t, c; q^{(1)})\|^2 \alpha'(t) dt - \int \mathbb{E}_\epsilon \|\epsilon - \tilde{s}(x_t, t, c; \tilde{q})\|^2 \alpha'(t) dt \\
&= \int \mathbb{E}_\epsilon (\|\tilde{s}(x_t, t, c; q^{(1)})\|^2 - \|\tilde{s}(x_t, t, c; \tilde{q})\|^2) \alpha'(t) dt \\
&= \sum_{j \in J} \int_{t \in j} \mathbb{E}_\epsilon (\|\tilde{s}(x_t, t, c; q^{(1)})\|^2 - \|\tilde{s}(x_t, t, c; \tilde{q})\|^2) \alpha'(t) dt \\
&= \sum_{j=[t_i, t_{i+1}] \in J} \int_{t \in j} \mathbb{E}_\epsilon (\|\tilde{s}(x_t, t, c; q^{(1)})\|^2 - \|\tilde{s}(x_t, t, c; q^{(2)})\|^2) \alpha'(t) dt \\
&= \sum_{j=[t_i, t_{i+1}] \in J, t' \in j} \mathbb{E}_\epsilon (\|\tilde{s}(x'_t, t', c; q^{(1)})\|^2 - \|\tilde{s}(x'_t, t', c; q^{(2)})\|^2) \alpha'(t') (t_{i+1} - t_i) \\
&= \sum_{j=[t_i, t_{i+1}] \in J, t' \in j} \mathbb{E}_\epsilon (\|\tilde{s}(x'_t, t', c; q^{(1)})\|^2 - \|\tilde{s}(x'_t, t', c; q^{(2)})\|^2) \alpha'(t') (t_{i+1} - t_i) \\
&\leq \max_{t' \in J} \mathbb{E}_\epsilon (\|\tilde{s}(x'_t, t', c; q^{(1)})\|^2 - \|\tilde{s}(x'_t, t', c; q^{(2)})\|^2) \alpha'(t') \sum_{j=[t_i, t_{i+1}] \in J, t' \in j} (t_{i+1} - t_i) \\
&= k_c
\end{aligned} \tag{16}$$

$J$  is our control parameter in CPR-Choose which controls  $k_c$ . If a conservative approach is to be followed, then  $J$  should be chosen such that  $\sum_{j=[t_i, t_{i+1}] \in J, t' \in j} (t_{i+1} - t_i)$  is small, which bounds  $k_c$ , the copy-protection leakage.

**CPR-Min, CPR-Alt** In practice we discretize the time-steps of the backward diffusion process. In this setting we protect the entire sequence  $\{x_T, \dots, x_0\}$  instead of protecting only the final prediction  $x_0$ . The probability of the sequence  $\{x_T, \dots, x_0\}$  is denoted by  $\tilde{q}(x_0|x_1, c) \dots \tilde{q}(x_{T-1}|x_T, c) \tilde{q}(x_T|c)$  using the chain rule of probability. To show that the method satisfies NAF, we need to bound:

$$\begin{aligned}
\log \frac{\tilde{q}(\{x_0, \dots, x_T\}|c)}{q^{(1)}(\{x_0, \dots, x_T\}|c)} &= \log \prod_t \frac{\tilde{q}(x_t|x_{t+1}, c)}{q^{(1)}(x_t|x_{t+1}, c)} \\
&= \log \prod_{t \in J} \frac{q^{(2)}(x_t|x_{t+1}, c)}{q^{(1)}(x_t|x_{t+1}, c)} \\
&= \sum_{t \in J} \log \frac{q^{(2)}(x_t|x_{t+1}, c)}{q^{(1)}(x_t|x_{t+1}, c)} \\
&= \sum_{t \in J} \log \frac{\mathcal{N}(x_t; \alpha_{1,t}x_{t+1} + \alpha_{2,t}\tilde{s}(x_{t+1}, t+1, c, q^{(2)}), \sigma_t^2 I)}{\mathcal{N}(x_t; \alpha_{1,t}x_{t+1} + \alpha_{2,t}\tilde{s}(x_{t+1}, t+1, c, q^{(1)}), \sigma_t^2 I)} \\
&= \sum_{t \in J} \frac{1}{\sigma_t^2} \left( \|x_t - \alpha_{1,t}x_{t+1} + \alpha_{2,t}\tilde{s}(x_{t+1}, t+1, c, q^{(1)})\|^2 \right. \\
&\quad \left. - \|x_t - \alpha_{1,t}x_{t+1} + \alpha_{2,t}\tilde{s}(x_{t+1}, t+1, c, q^{(2)})\|^2 \right) \\
&\leq \max_t \left( \|x_t - \alpha_{1,t}x_{t+1} + \alpha_{2,t}\tilde{s}(x_{t+1}, t+1, c, q^{(1)})\|^2 \right. \\
&\quad \left. - \|x_t - \alpha_{1,t}x_{t+1} + \alpha_{2,t}\tilde{s}(x_{t+1}, t+1, c, q^{(2)})\|^2 \right) \sum_{t \in J} \frac{1}{\sigma_t^2} \\
&\leq b \sum_{t \in J} \frac{1}{\sigma_t^2} \\
&= k_c
\end{aligned} \tag{17}$$

where  $\alpha_{1,t}, \alpha_{2,t}, \sigma_t^2$  are the coefficients using the backward diffusion depending on the choice of sampler, for eg. DDPM [27], DDIM [58], Langevin dynamics [12],  $b$  is an upper bound on the maximum difference between the MSE for the two

diffusion processes. Similar to the previous derivation,  $\sum_{t \in J} \frac{1}{\sigma_t^2}$  through  $J$  provides a control knob to the user to control the  $\Delta_{\max}$  for copy-protected generation.  $\square$

## B. Implementation Details

We use the Stable diffusion [49] and Stable diffusion unCLIP [47] model for all the experiments in the paper. We use the Stable diffusion model to generate safe flow corresponding to the safe distribution  $q^{(1)}$ , and the Stable diffusion unCLIP model to generate the retrieval mixture score  $q^{(2)}$ . We use classifier free guidance with a guidance scale of 7.5 in all the results. We use 2k samples from the MSCOCO dataset [36] as our private retrieval data store.

## C. Additional Figures

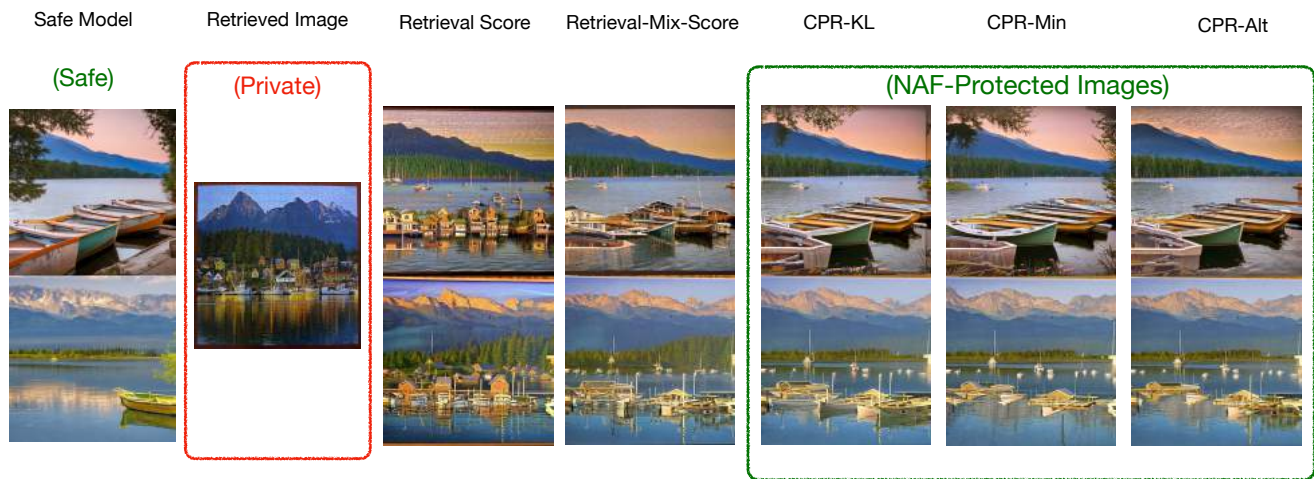

Prompt: A scenic view features a calm lake, boats and mountains in the distance.

Figure 5

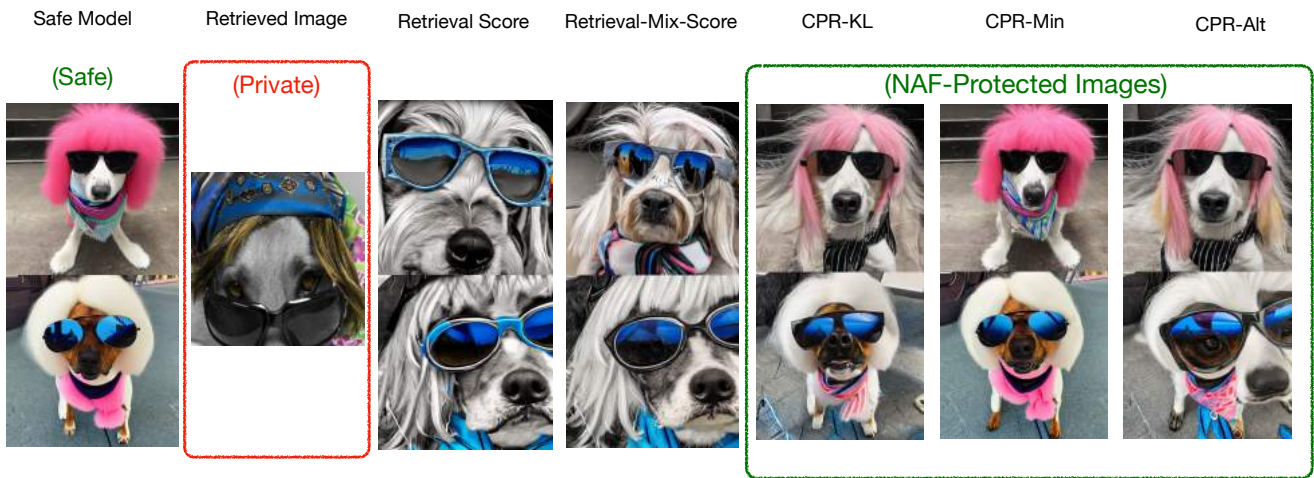

Prompt: A dog dressed in sunglasses, wig, and a scarf.

Figure 6

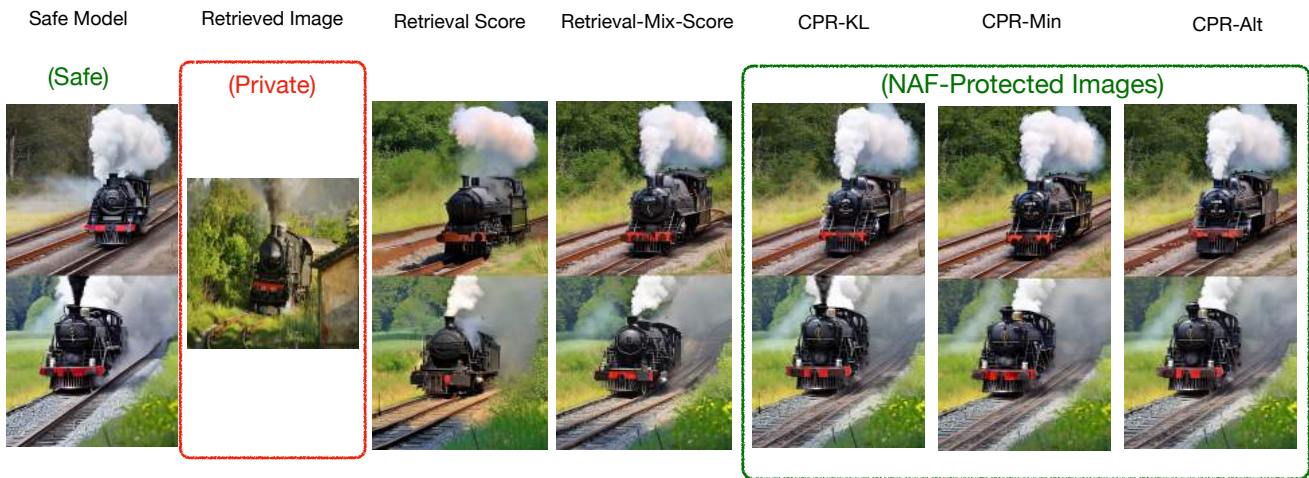

Prompt: A steaming locomotive coming down the tracks quickly.

Figure 7
